# Supplementary material for: Nanocrystalline ceria: a novel material for electrorheological fluids
Source: Royal Society of Chemistry journal article supplement (doi:10.1039/c6ra15095k), 2016-01-01
Supplement: c6ra15095k1.pdf [file c6ra15095k1.pdf]

## Electronic Supplementary Information

### NANOCRYSTALLINE CERIA: A NOVEL MATERIAL FOR ELECTRORHEOLOGICAL FLUIDS

A.V. Agafonov<sup>1,2</sup>, A.S. Krayev<sup>1</sup>, O.I. Davydova<sup>1</sup>, K.V. Ivanov<sup>1</sup>, T.O. Shekunova<sup>3,4</sup>, A.E. Baranchikov<sup>3,4</sup>, O.S. Ivanova<sup>3</sup>, L.P. Borilo<sup>2</sup>, A.V. Garshev<sup>4</sup>, V.V. Kozik<sup>2</sup>, V.K. Ivanov<sup>2,3,4</sup>

<sup>1</sup> *Krestov Institute of Solution Chemistry of the Russian Academy of Sciences, Ivanovo, Russia*

<sup>2</sup> *National Research Tomsk State University, Tomsk, Russia*

<sup>3</sup> *Kurnakov Institute of General and Inorganic Chemistry of the Russian Academy of Sciences, Moscow, Russia*

<sup>4</sup> *Lomonosov Moscow State University, Moscow, Russia*

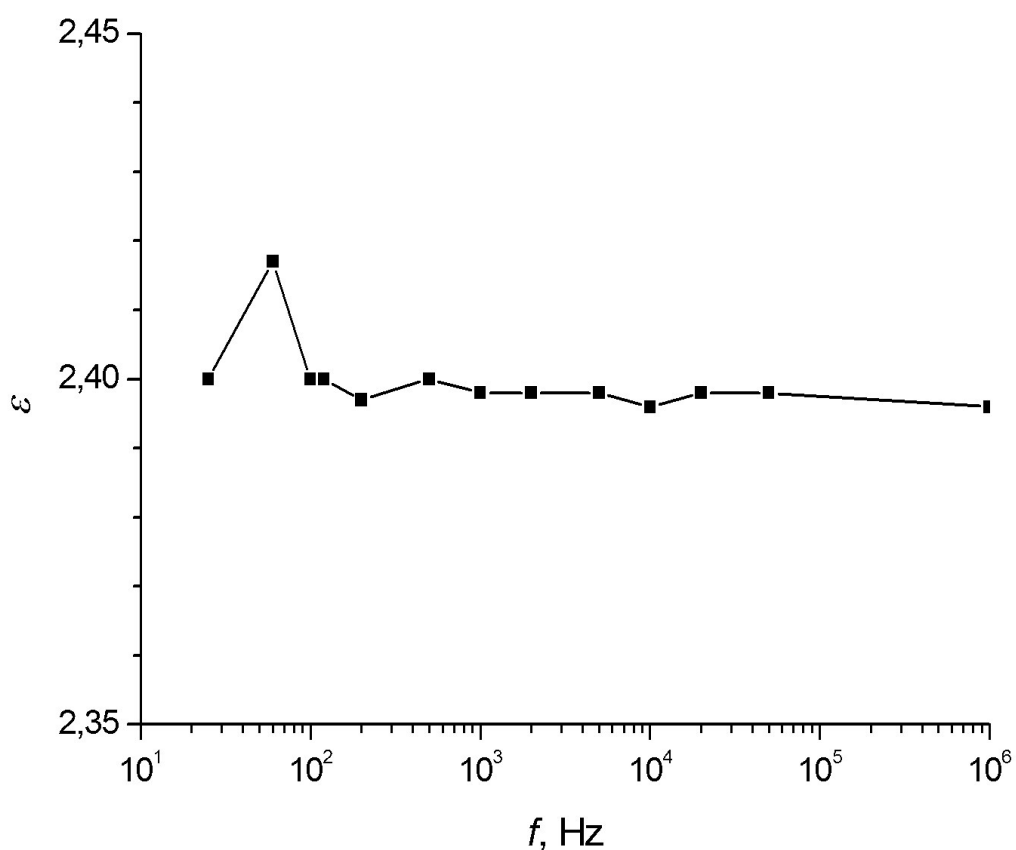

Fig. S1. Dielectric spectrum of PDMS.

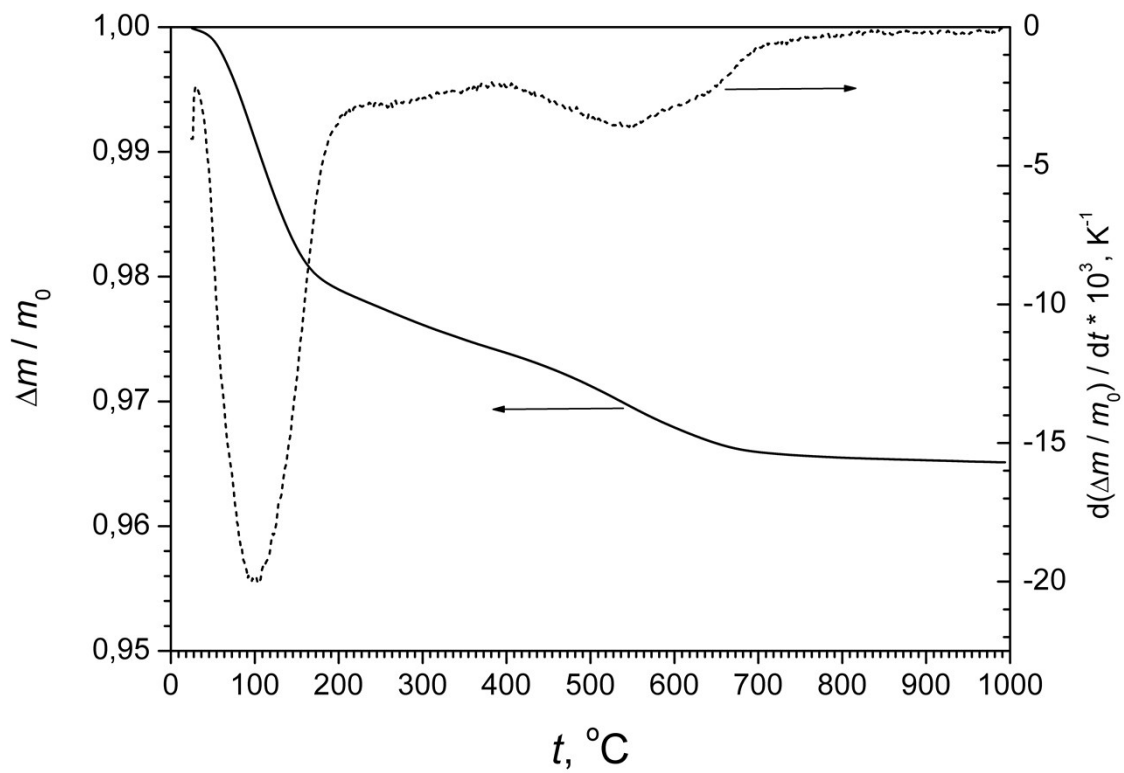

Fig. S2. Results of thermogravimetric analysis of the ceria sample.

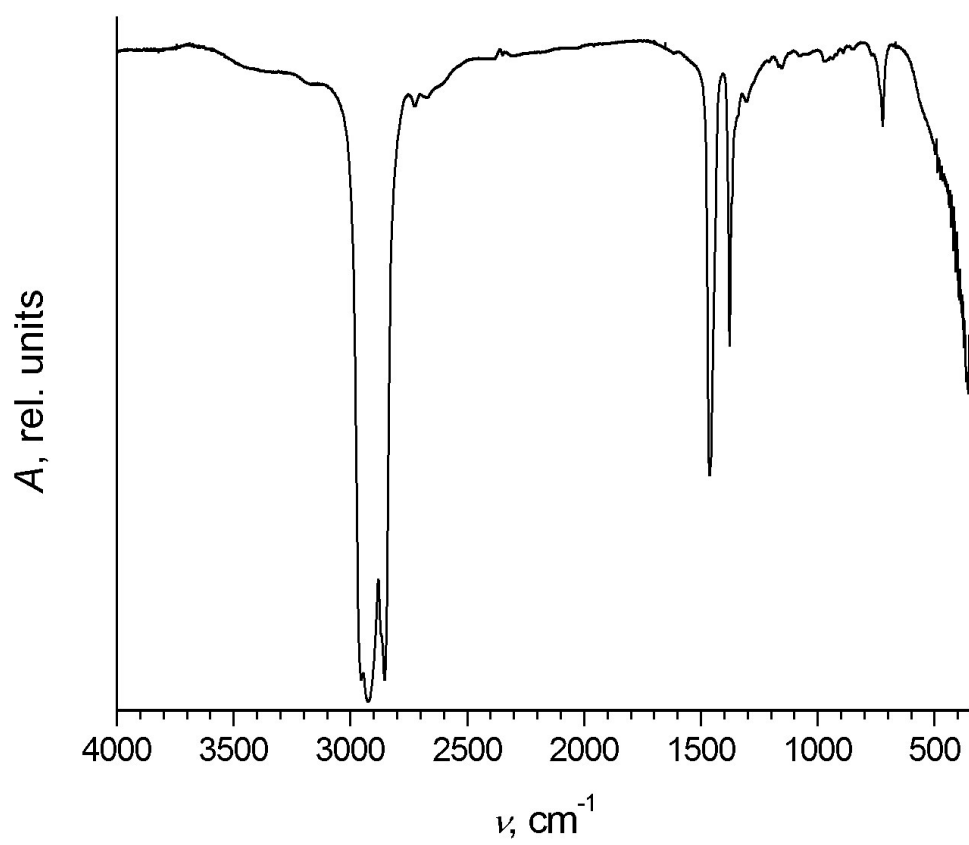

Fig S3. IR-spectrum of ceria sample.

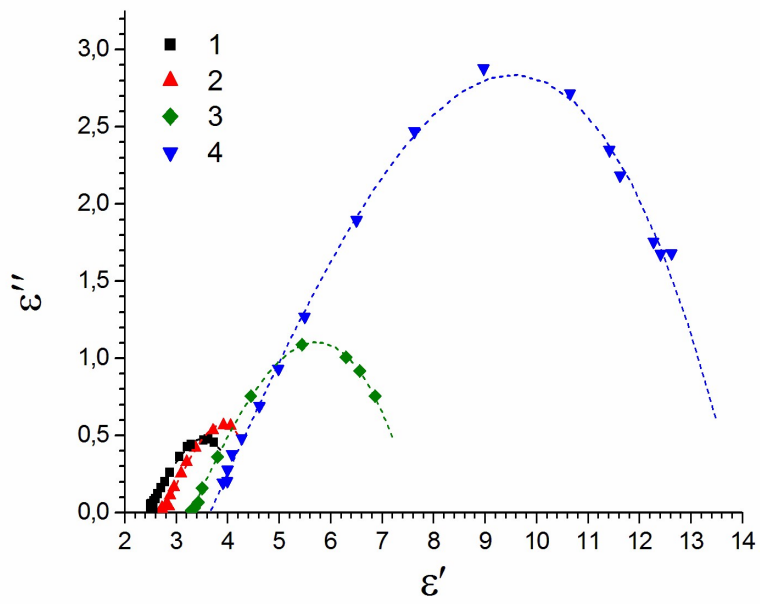

Fig. S4. Cole-Cole arcs for CeO<sub>2</sub> based ER fluids containing 30 wt.% (1), 40 wt.% (2), 50 wt.% (3) and 60 wt.% (4) CeO<sub>2</sub> in silicone oil.

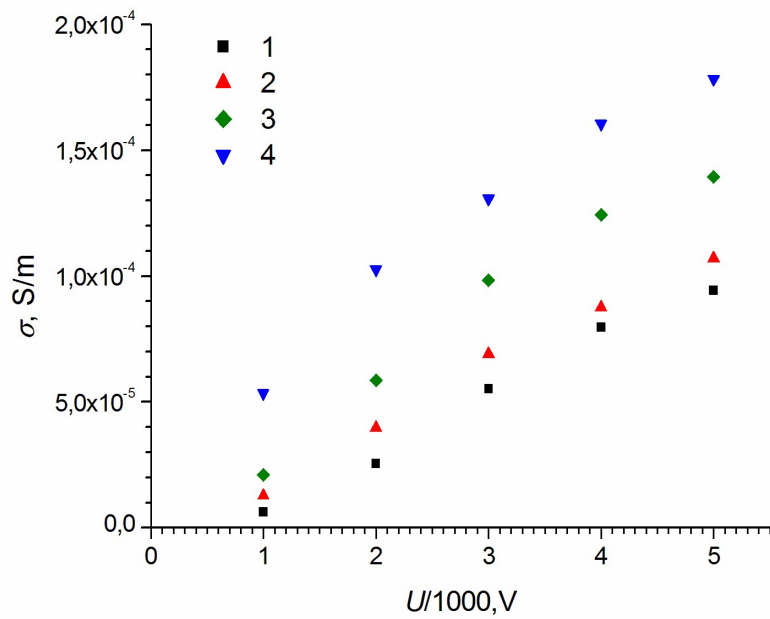

Fig. S5. Electric conductivity versus electrical field strength for electrorheological fluids containing 30 wt.% (1), 40 wt.% (2), 50 wt.% (3) and 60 wt.% (4) CeO<sub>2</sub>. Electrode gap is 1 mm.

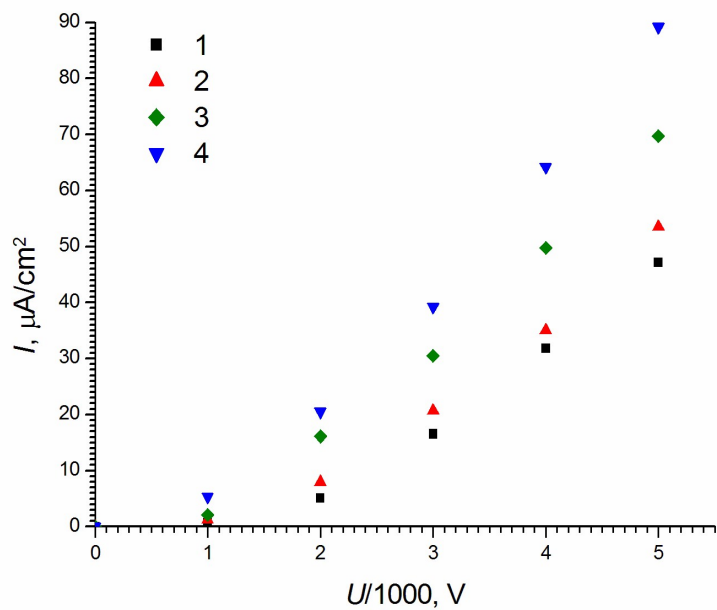

Fig. S6. Current density versus electrical field strength for electrorheological fluids containing 30 wt.% (1), 40 wt.% (2), 50 wt.% (3) and 60 wt.% (4)  $\text{CeO}_2$ . Electrode gap is 1 mm.

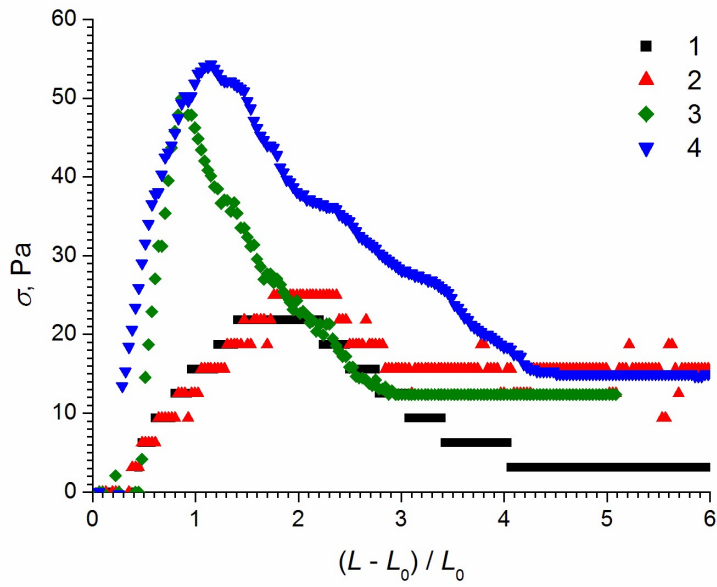

Fig. S7. Tensile stress ( $\sigma$ ) versus relative deformation ( $(L - L_0)/L_0$ ) plot for ceria/PDMS-based ER fluids with 30 (1), 40 (2), 50 (3) and 60 (4) wt.% of  $\text{CeO}_2$ , in the absence of an electric field.

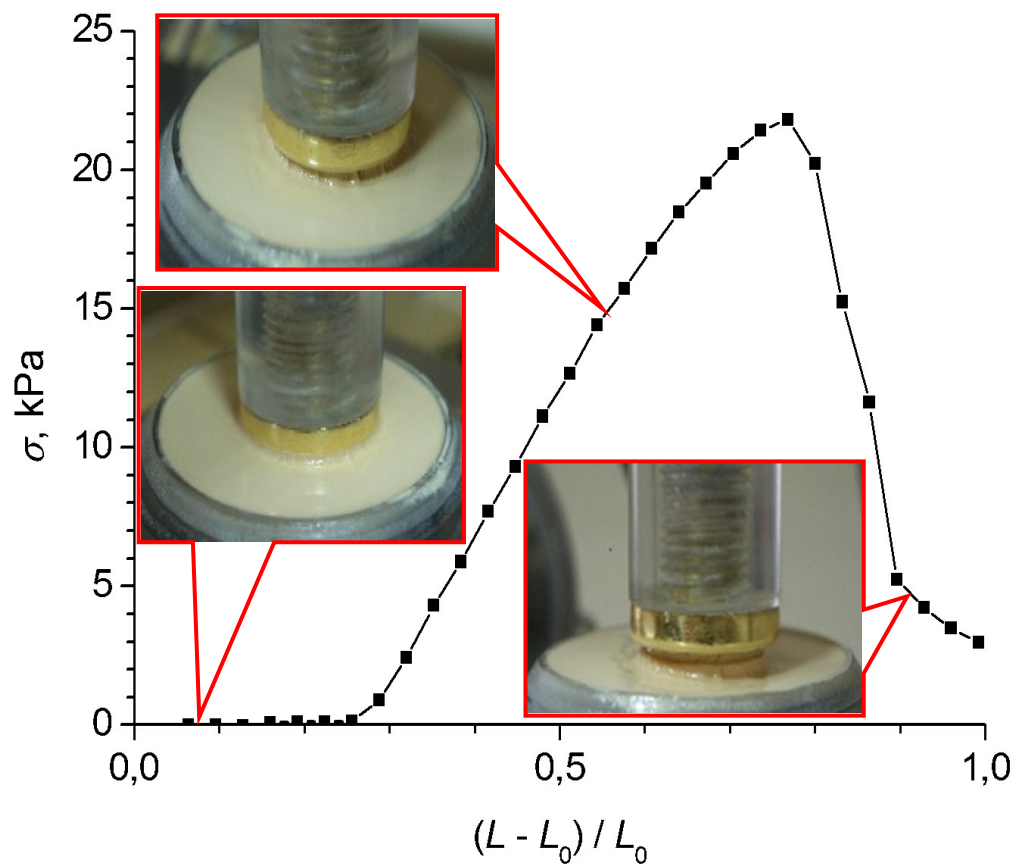

Fig. S8. The appearance of ceria-based ER-fluid comprising 60 wt.% CeO<sub>2</sub>, in a 5 kV/mm static electric field.



Table S1. The influence of ceria concentration (vol.%) and electric field strength on the yield strength of the corresponding ER fluids.

| $E$ ,<br>kV/mm | Yield strength, kPa |              |               |               | Yield strength normalized to the yield strength at 1 kV/mm |              |               |               |
|----------------|---------------------|--------------|---------------|---------------|------------------------------------------------------------|--------------|---------------|---------------|
|                | 5.3<br>vol.%        | 8.4<br>vol.% | 12.1<br>vol.% | 16.8<br>vol.% | 5.3<br>vol.%                                               | 8.4<br>vol.% | 12.1<br>vol.% | 16.8<br>vol.% |
| 1              | 0.4                 | 0.7          | 3.0           | 4.0           | 1.0                                                        | 1.0          | 1.0           | 1.0           |
| 2              | 1.0                 | 1.5          | 7.0           | 11.1          | 2.5                                                        | 2.1          | 2.3           | 2.8           |
| 3              | 2.0                 | 2.6          | 11.1          | 17.9          | 5.0                                                        | 3.7          | 3.7           | 4.5           |
| 4              | 3.0                 | 4.4          | 13.9          | 19.9          | 7.5                                                        | 6.2          | 4.6           | 5.0           |
